# Supplementary material
Source: publisher site journal article supplement (https://www.dovepress.com/article/489960)
Supplement: Supplementary file 1 [file get_supplementary_file.php]

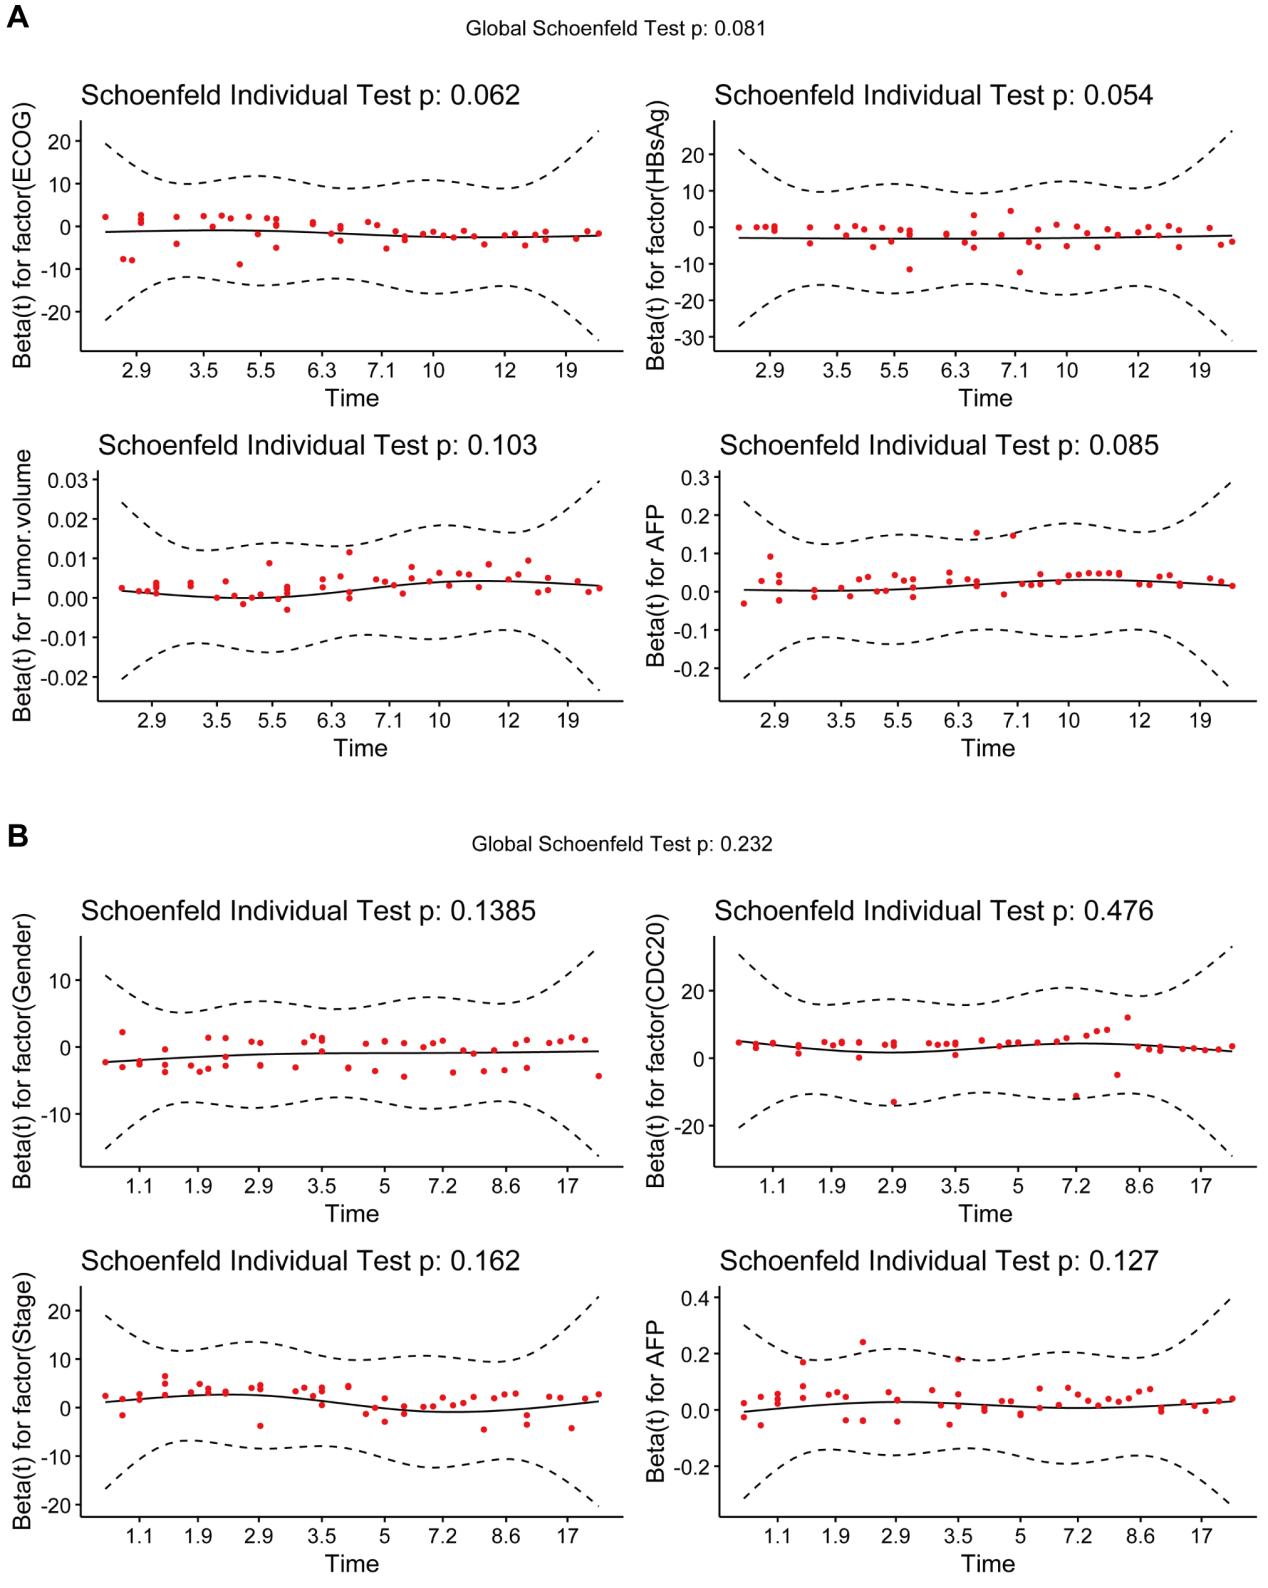


**Supplementary Figure 1** Schoenfeld residuals plot of Proportional Hazards assumption test.

ECOG, Eastern Cooperative Oncology Group. HBsAg, Hepatitis B Surface Antigen. AFP, alph-fetoprotein. CDC20, Cell Division Cycle 20.


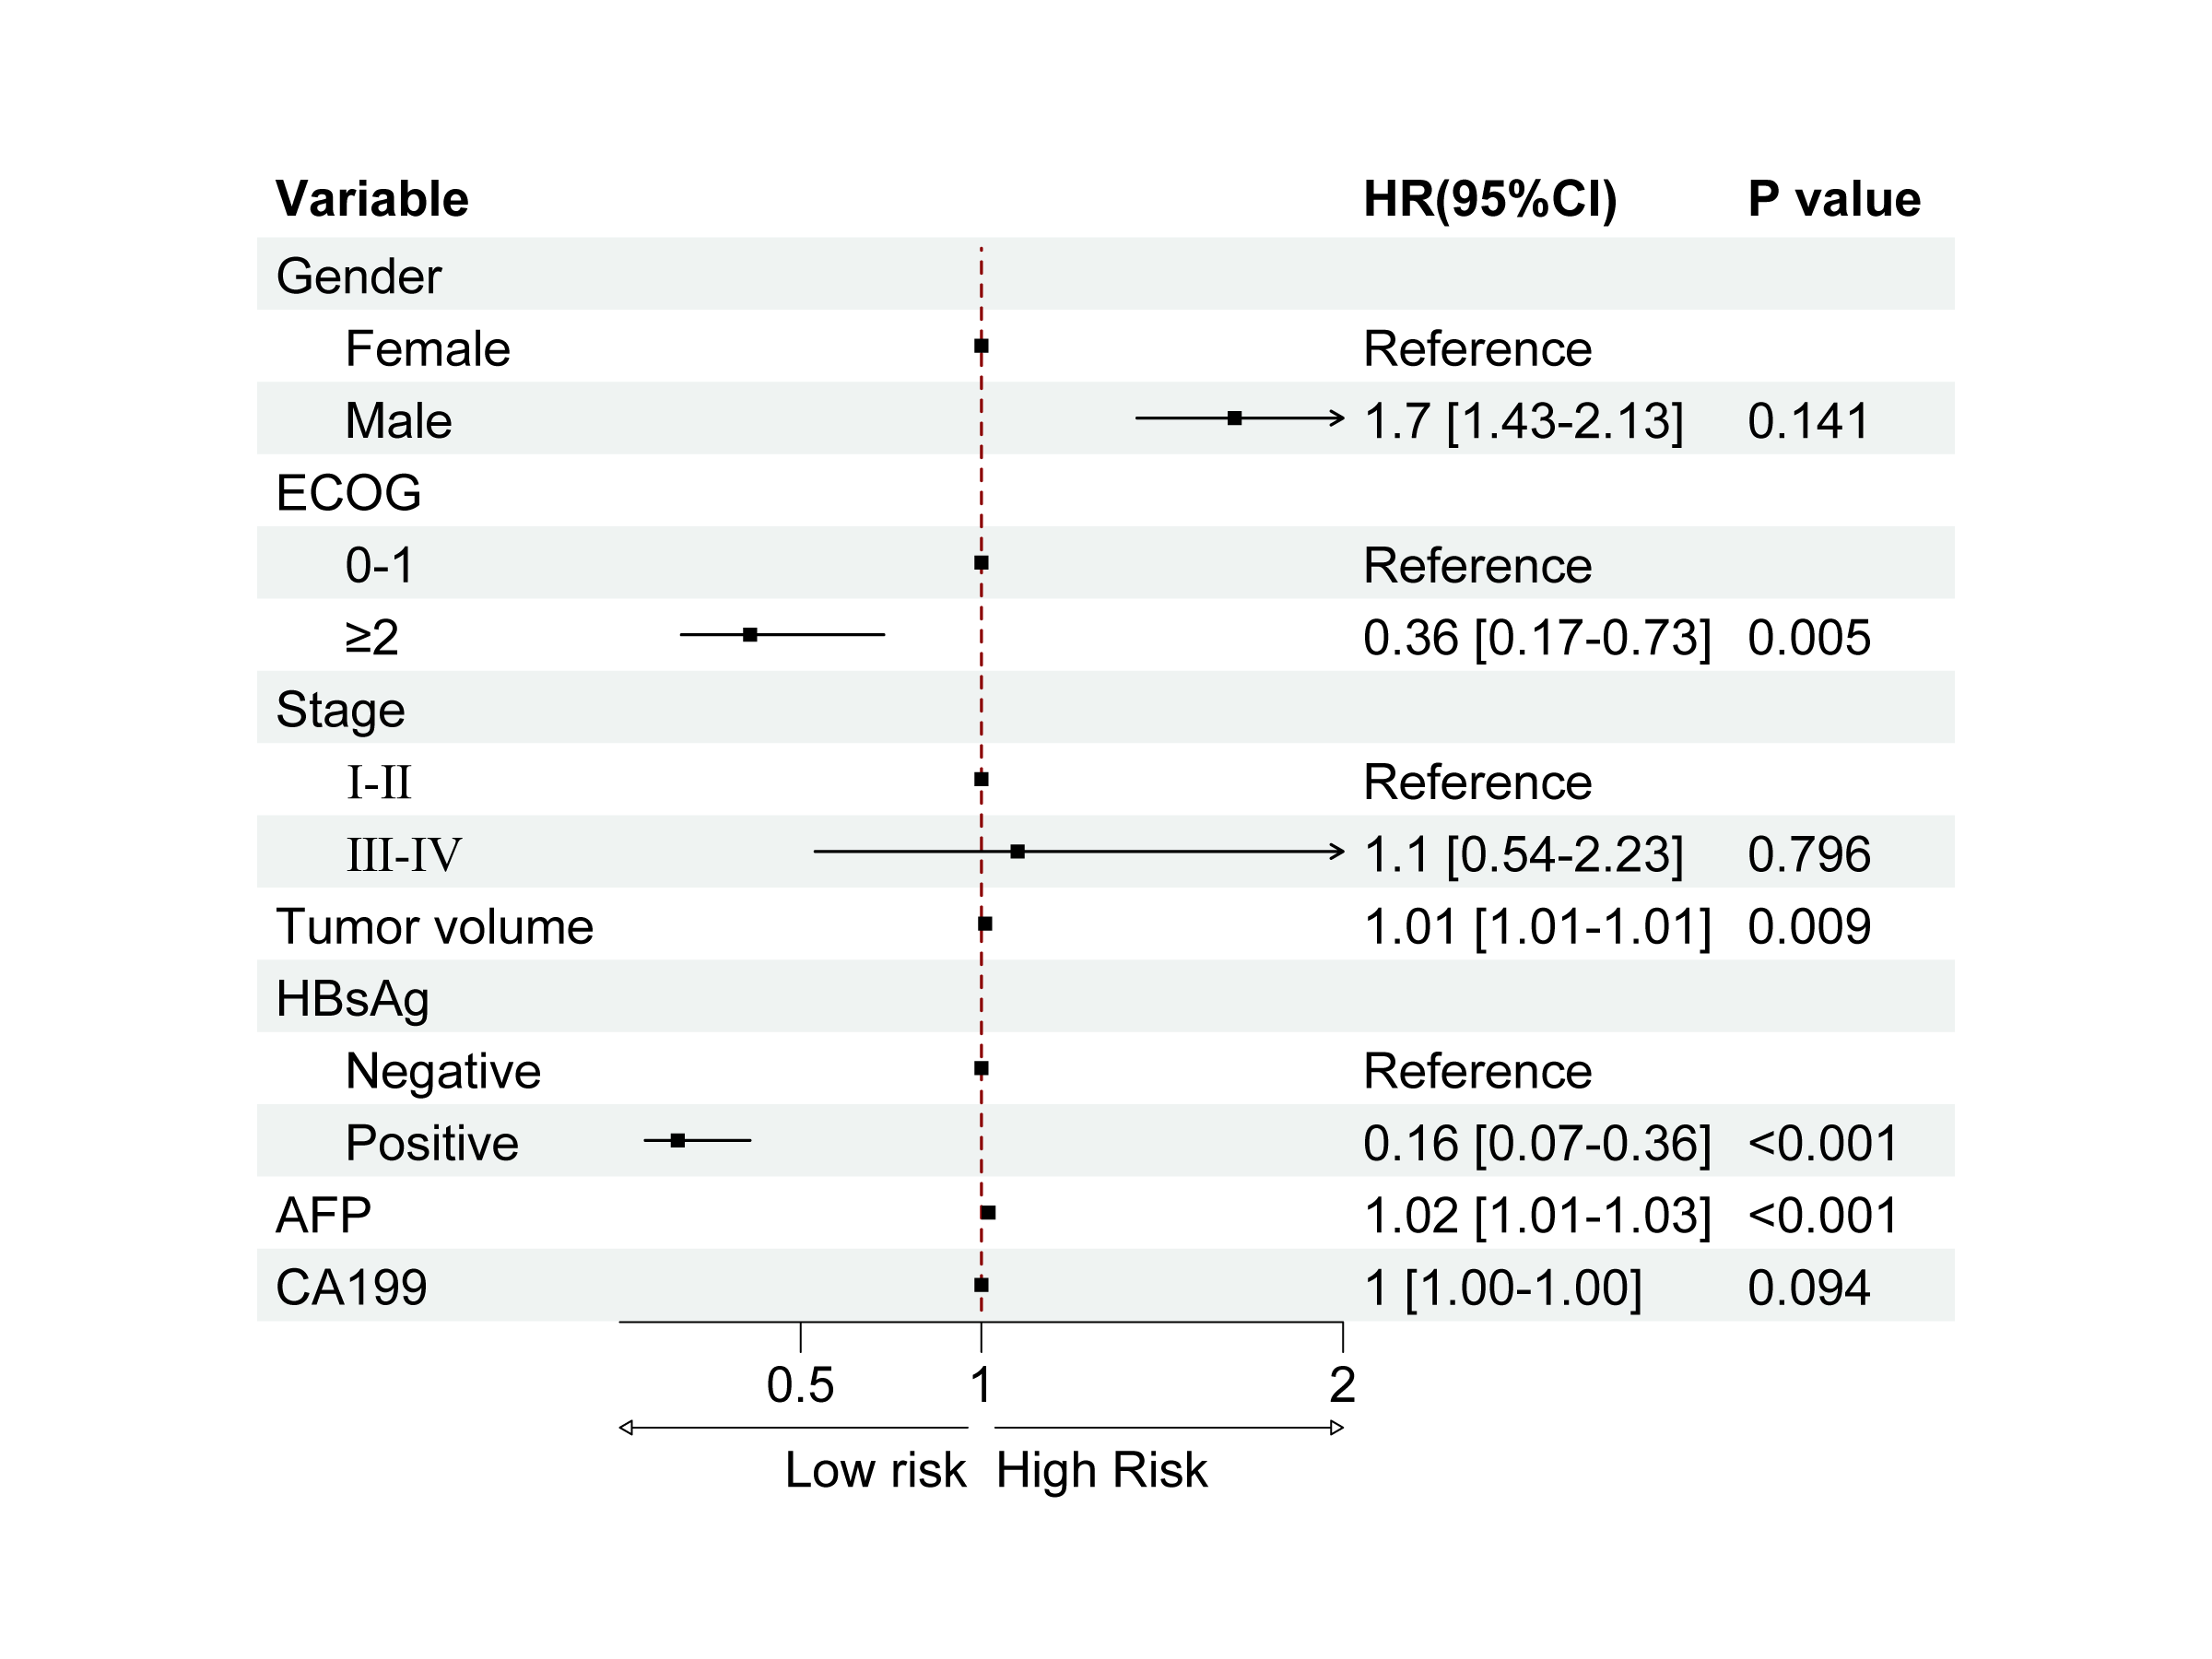


**Supplementary Figure 2** Forest plot of multivariate Cox regression analysis for predicting OS in patients with unresectable intrahepatic cholangiocarcinoma.

ECOG, Eastern Cooperative Oncology Group. HBsAg, Hepatitis B Surface Antigen. AFP, alph-fetoprotein. CA199, Carbohydrate Antigen 19-9.


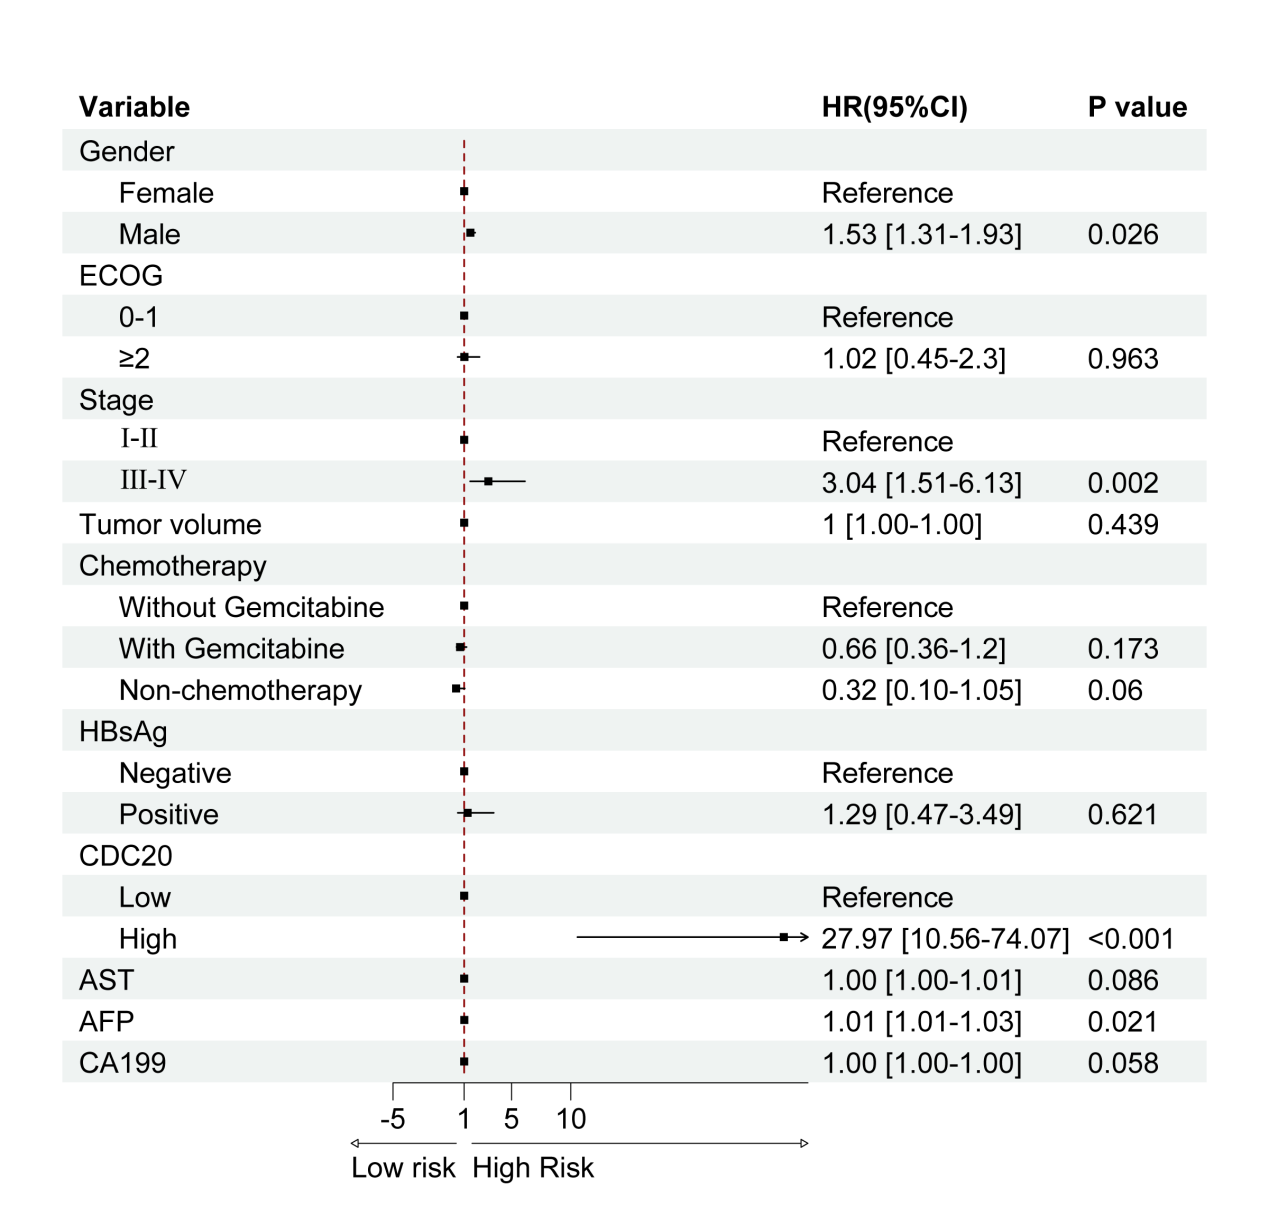


**Supplementary Figure 3** Forest plot of multivariate Cox regression analysis for predicting PFS in patients with unresectable intrahepatic cholangiocarcinoma

ECOG, Eastern Cooperative Oncology Group. HBsAg, Hepatitis B Surface Antigen. CDC20, Cell Division Cycle 20. AST, Aspartate Aminotransferase. AFP, alph-fetoprotein. CA199, Carbohydrate Antigen 19-9.

**Supplementary Table 1** The amount and proportion of missing values for variables with less than 50% missing data

| **Variables** | **Missing values** | **% of total values** |
| --- | --- | --- |
| ECOG | 52 | 47.3 |
| AFP | 42 | 38.2 |
| HBsAg | 40 | 36.4 |
| Child.Pugh | 38 | 34.5 |
| Tumor.volume | 37 | 33.6 |
| Diameter | 25 | 22.7 |
| Stage | 14 | 12.7 |
| CA199 | 12 | 10.9 |
| ALB | 2 | 1.8 |

ECOG, Eastern Cooperative Oncology Group. AFP, alph-fetoprotein. HBsAg, Hepatitis B Surface Antigen. CA199, Carbohydrate Antigen 19-9. ALB, albumin.

**Supplementary Table 2** Assigned scores for each parameter in the OS nomogram based on the multivariate Cox regression model

| OS | | | | | | | | | |
| --- | --- | --- | --- | --- | --- | --- | --- | --- | --- |
| Variables | | Points |  | Variables | | Points |  | Total points | 6-month survival |
| ECOG | 0-1 | 58 |  | AFP | 0 | 0 |  | 79 | 0.9 |
| ≥ 2 | 0 |  | 10 | 7 |  | 110 | 0.8 |
| HBsAg | Negative | 100 |  | 20 | 14 |  | 129 | 0.7 |
| Positive | 0 |  | 30 | 20 |  | 144 | 0.6 |
| Tumor.volume | 0 | 0 |  | 40 | 27 |  | 157 | 0.5 |
| 100 | 4 |  | 50 | 34 |  | 168 | 0.4 |
| 200 | 9 |  | 60 | 41 |  | 180 | 0.3 |
| 300 | 13 |  | 70 | 47 |  | 192 | 0.2 |
| 400 | 18 |  | 80 | 54 |  | 206 | 0.1 |
| 500 | 22 |  | 90 | 61 |  | Total points | 12-month survival |
| 600 | 26 |  | 100 | 68 |  | 62 | 0.7 |
| 700 | 31 |  | 110 | 74 |  | 77 | 0.6 |
| 800 | 35 |  | 120 | 81 |  | 90 | 0.5 |
| 900 | 39 |  | 130 | 88 |  | 101 | 0.4 |
| 1000 | 44 |  |  |  |  |  | 113 | 0.3 |
| 1100 | 48 |  |  |  |  |  | 125 | 0.2 |
| 1200 | 53 |  |  |  |  |  | 140 | 0.1 |
| PFS | | | | | | | | | |
| Variables | | Points |  | Variables | | Points |  | Total points | 6-month survival |
| Gender | Female | 35 |  | AFP | 120 | 58 |  | 60 | 0.9 |
| Male | 0 |  | 130 | 63 |  | 84 | 0.8 |
| CDC20 | Low | 0 |  |  |  |  |  | 100 | 0.7 |
| High | 100 |  |  |  |  |  | 111 | 0.6 |
| Stage | I-II | 0 |  |  |  |  |  | 121 | 0.5 |
| III | 17 |  |  |  |  |  | 130 | 0.4 |
| IV | 34 |  |  |  |  |  | 139 | 0.3 |
| AFP | 0 | 0 |  |  |  |  |  | 148 | 0.2 |
| 10 | 5 |  |  |  |  |  | 160 | 0.1 |
| 20 | 10 |  |  |  |  |  | Total points | 6-month survival |
| 30 | 15 |  |  |  |  |  | 21 | 0.8 |
| 40 | 19 |  |  |  |  |  | 36 | 0.7 |
| 50 | 24 |  |  |  |  |  | 48 | 0.6 |
| 60 | 29 |  |  |  |  |  | 58 | 0.5 |
| 70 | 34 |  |  |  |  |  | 67 | 0.4 |
| 80 | 39 |  |  |  |  |  | 76 | 0.3 |
| 90 | 44 |  |  |  |  |  | 85 | 0.2 |
| 100 | 49 |  |  |  |  |  | 97 | 0.1 |
| 110 | 53 |  |  |  |  |  |  |  |

ECOG, Eastern Cooperative Oncology Group. AFP, alph-fetoprotein. HBsAg, Hepatitis B Surface Antigen. CDC20, Cell Division Cycle 20. OS, Overall Survival. PFS, Progress-Free Survival.
